# Supplementary material for: Ligand assisted growth of perovskite single crystals with low defect density
Source: PubMed Central journal article supplement (PMC7966356; doi:10.1038/s41467-021-21934-6), 2021-03-16
Supplement: 41467_2021_21934_MOESM1_ESM.pdf [file 41467_2021_21934_MOESM1_ESM.pdf]

## **Supplementary Information**

for

### **Ligand Assisted Growth of Perovskite Single Crystals with Low Defect**

### **Density**

Ye Liu<sup>1,2</sup>, Xiaopeng Zheng<sup>2</sup>, Yanjun Fang<sup>2</sup>, Ying Zhou<sup>1</sup>, Zhenyi Ni<sup>1</sup>, Xun Xiao<sup>1</sup>, Shangshang  
Chen<sup>1</sup>, Jinsong Huang<sup>1\*</sup>

<sup>1</sup>Department of Applied Physical Sciences, University of North Carolina, Chapel Hill, NC 27599,  
USA.

<sup>2</sup>Department of Mechanical and Materials Engineering University of Nebraska-Lincoln, Lincoln,  
Nebraska 68588, USA

**Supplementary Table 1.** Dark current drift and resistivity of the as-grown MAPbI<sub>3</sub> crystals with DPSI in Fig. S6 without any surface treatment.

| Electric field<br>(V cm <sup>-1</sup> ) | Dark current<br>(nA cm <sup>-2</sup> ) | Resistivity<br>(Ω cm) | Current drift<br>(nA cm <sup>-1</sup> v <sup>-1</sup> s <sup>-1</sup> ) |
|-----------------------------------------|----------------------------------------|-----------------------|-------------------------------------------------------------------------|
| 50                                      | 27.2                                   | $1.84 \times 10^9$    | $5.95 \times 10^{-5}$                                                   |
| 125                                     | 48.8                                   | $2.56 \times 10^9$    | $2.45 \times 10^{-5}$                                                   |
| 250                                     | 80                                     | $3.13 \times 10^9$    | $1.48 \times 10^{-5}$                                                   |

**Supplementary Table 2.** Summary of the sensitivity and lowest detectable dose rate of different perovskite X-ray direct and indirect radiation detectors.

|                                        | Perovskite composition                                           | X-ray energy<br>(keV or kVp) | Sensitivity<br>(μC Gy <sup>-1</sup> air cm <sup>-2</sup> ) | Lowest detectable dose rate<br>(μGy air s <sup>-1</sup> ) | Dark current drift<br>(nA cm <sup>-1</sup> v <sup>-1</sup> s <sup>-1</sup> ) | References |
|----------------------------------------|------------------------------------------------------------------|------------------------------|------------------------------------------------------------|-----------------------------------------------------------|------------------------------------------------------------------------------|------------|
| Indirect conversion<br>(Scintillators) | MAPbCl <sub>3</sub><br>single crystal                            | 50                           |                                                            | 0.1147                                                    |                                                                              | 4          |
|                                        | Ru <sub>2</sub> CuBr <sub>3</sub>                                | 30                           |                                                            | 0.1215                                                    |                                                                              | 5          |
|                                        | Rb <sub>3</sub> Bi <sub>2</sub> I <sub>9</sub>                   | 50                           | 159.7<br>(1 V bias)                                        | 0.00832                                                   | $1.82 \times 10^{-7}$                                                        | 6          |
|                                        | MAPbBr <sub>3</sub><br>single crystal                            | 8                            | 80                                                         | 0.5                                                       |                                                                              | 1          |
|                                        | MAPbBr <sub>3</sub> /Si<br>integration                           | 8                            | $2.1 \times 10^4$                                          | 0.036                                                     | $1.2 \times 10^{-3}$                                                         | 3          |
|                                        | MAPbBr <sub>x</sub> Cl <sub>3-x</sub><br>single crystal          | 8                            | $8.4 \times 10^4$                                          | 0.0076                                                    |                                                                              | 2          |
|                                        | MAPbBr <sub>3</sub><br>single crystal<br>(oil growth)            |                              | 184.6                                                      |                                                           |                                                                              | 7          |
|                                        | (NH <sub>4</sub> ) <sub>3</sub> Bi <sub>2</sub> I <sub>9</sub> - |                              | $8.2 \times 10^3$                                          | 0.055                                                     |                                                                              | 8          |

|                                            |                                                                 |     |                                       |         |                       |    |
|--------------------------------------------|-----------------------------------------------------------------|-----|---------------------------------------|---------|-----------------------|----|
| Direct conversion<br>(Radiation detectors) | 2D single crystal                                               |     |                                       |         |                       |    |
|                                            | BiOBr passivated Cs <sub>2</sub> AgBiBr <sub>6</sub> wafer film | 50  | 250<br>(0.5V μm <sup>-1</sup> )       | 0.0953  | 7.4×10 <sup>-5</sup>  | 9  |
|                                            | Cs <sub>2</sub> AgBiBr <sub>6</sub> single crystal              | 30  | 105                                   | 0.0597  |                       | 10 |
|                                            | MAPbI <sub>3</sub> cuboid shape crystal                         |     | 968.9                                 |         |                       | 11 |
|                                            | (GMA)MAPbI <sub>3</sub> single crystal                          | 8   | 2.3×10 <sup>4</sup><br>(5V bias)      | 0.0169  |                       | 12 |
|                                            | MAPbI <sub>3</sub> sintered wafer                               | 70  | 2.527 ×10 <sup>3</sup><br>(200V bias) |         | 1.7×10 <sup>-3</sup>  | 13 |
|                                            | MAPbI <sub>3</sub> pressed sinter                               | 40  | 1.22×10 <sup>5</sup><br>(10 V bias)   | 2.54    |                       | 14 |
|                                            | Cs <sub>3</sub> Bi <sub>2</sub> I <sub>9</sub> Single crystal   | 40  | 1.652×10 <sup>3</sup><br>(60 V bias)  | 0.130   |                       | 15 |
|                                            | (F-PEA) <sub>2</sub> PbI <sub>4</sub> 2D single crystal         | 120 | 3.402×10 <sup>3</sup><br>(200V bias)  | 0.023   | 4.9×10 <sup>-8</sup>  | 16 |
|                                            | MAPbI <sub>3</sub> (printable film)                             | 100 | 1.1×10 <sup>4</sup>                   |         |                       | 17 |
|                                            | MAPbI <sub>3</sub> (Cl) in membrane                             | 60  | 8,696±228                             |         |                       | 18 |
|                                            |                                                                 | 100 | 1.44×10 <sup>4</sup><br>(20V bias)    |         |                       |    |
|                                            | MAPbI <sub>3</sub> thin single crystal (co-planar)              | 50  | 7.0×10 <sup>5</sup><br>(5V bias)      | 0.0015  |                       | 19 |
|                                            |                                                                 | 8   | 2.1×10 <sup>5</sup><br>(10V bias)     | 0.00234 | 6.58×10 <sup>-6</sup> |    |

|  |                                                        |     |                                   |        |                      |           |
|--|--------------------------------------------------------|-----|-----------------------------------|--------|----------------------|-----------|
|  | MAPbI <sub>3</sub> single crystal with ligand-assisted |     | $2.8 \times 10^5$<br>(20V bias)   |        | $1.3 \times 10^{-5}$ | This work |
|  |                                                        | 60  | $2.9 \times 10^6$<br>(100V bias)  | 0.0057 | $4.7 \times 10^{-5}$ |           |
|  |                                                        | 100 | $6.51 \times 10^5$<br>(100V bias) |        |                      |           |
|  |                                                        | 120 | $1.04 \times 10^6$<br>(100V bias) |        |                      |           |

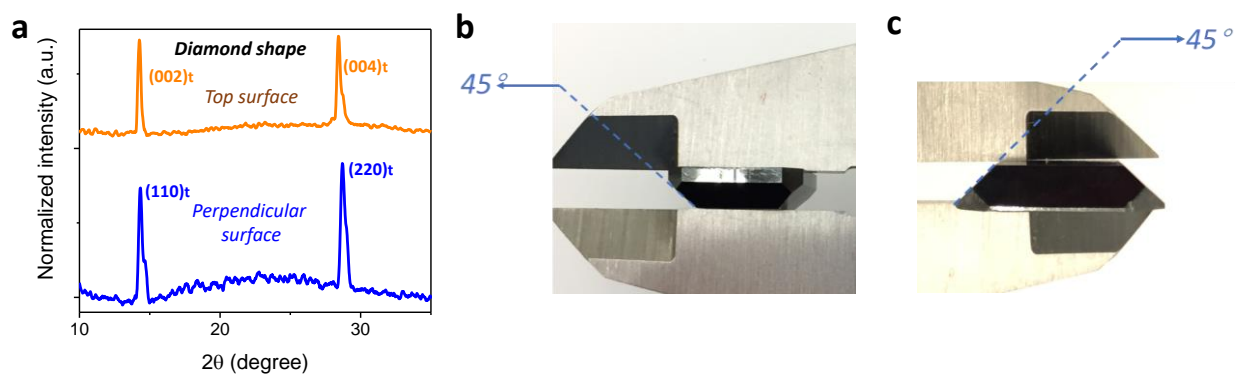

**Supplementary Fig. 1.** **a**) XRD pattern of different facets of the diamond-shaped crystal shown in Fig.1A. **b**, **c**) photos of the two crystals grown in 10% DPSI added, and the facet angles were measured.

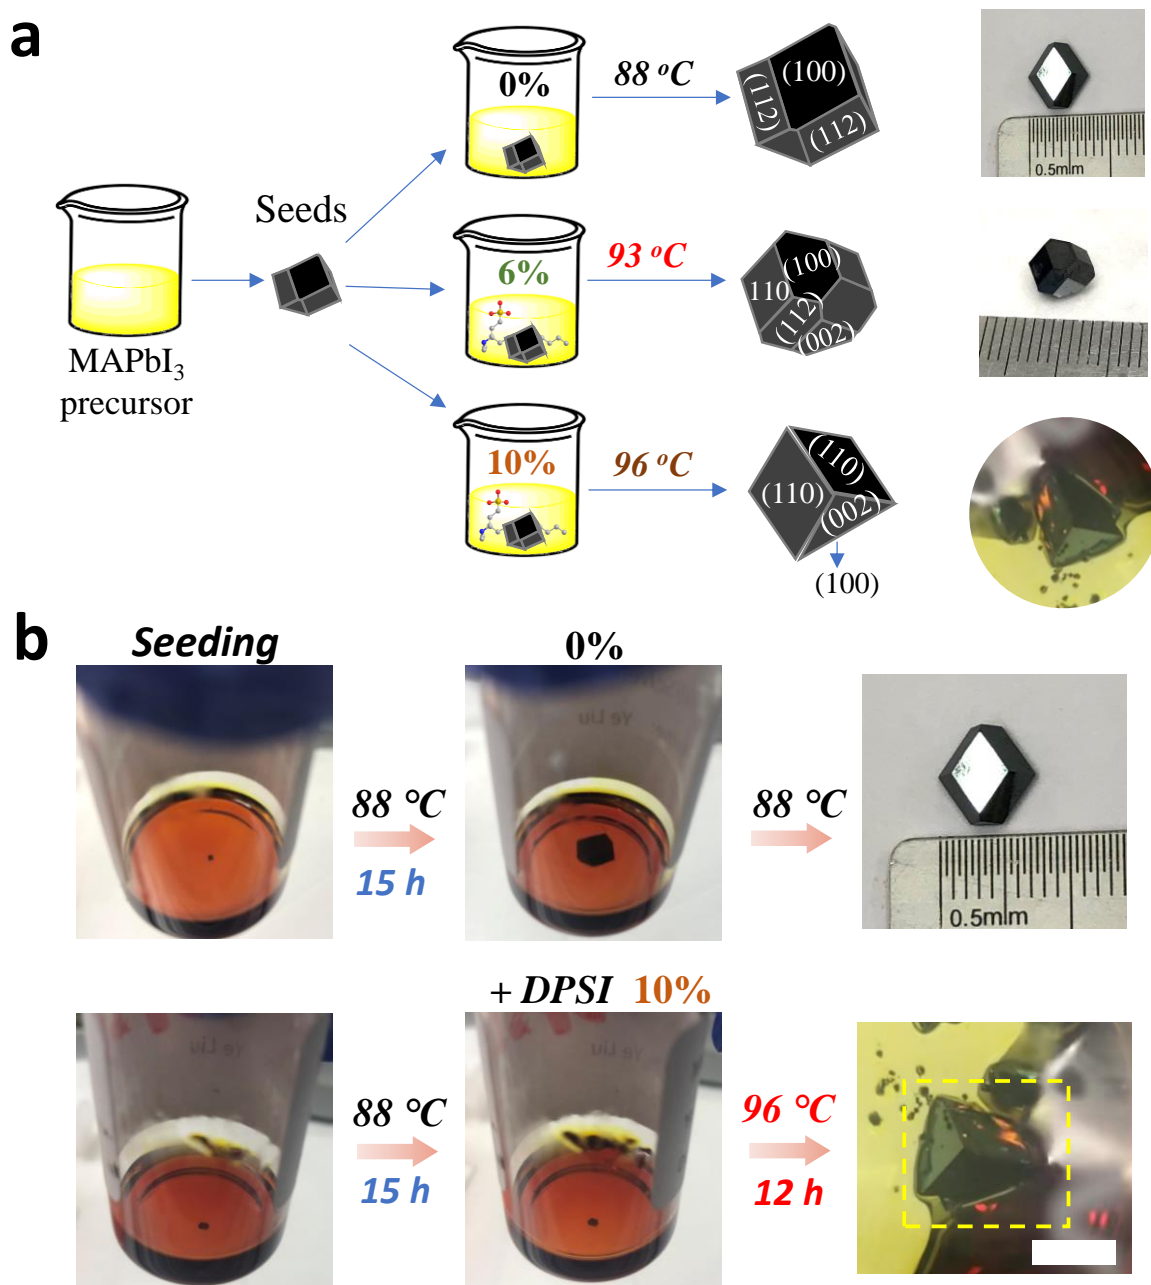

**Supplementary Fig. 2. Crystal growth behavior with ligand regulation after seeding. a)** Scheme and photos of crystal growth process after seeding dodecahedral crystals (pristine MAPbI<sub>3</sub> crystal) in precursor solutions w/o and with DPSI. **b)** The crystal growth rate comparison of the crystals w/o and with DPSI at different temperature after seeding. The scale bar is 5 mm.

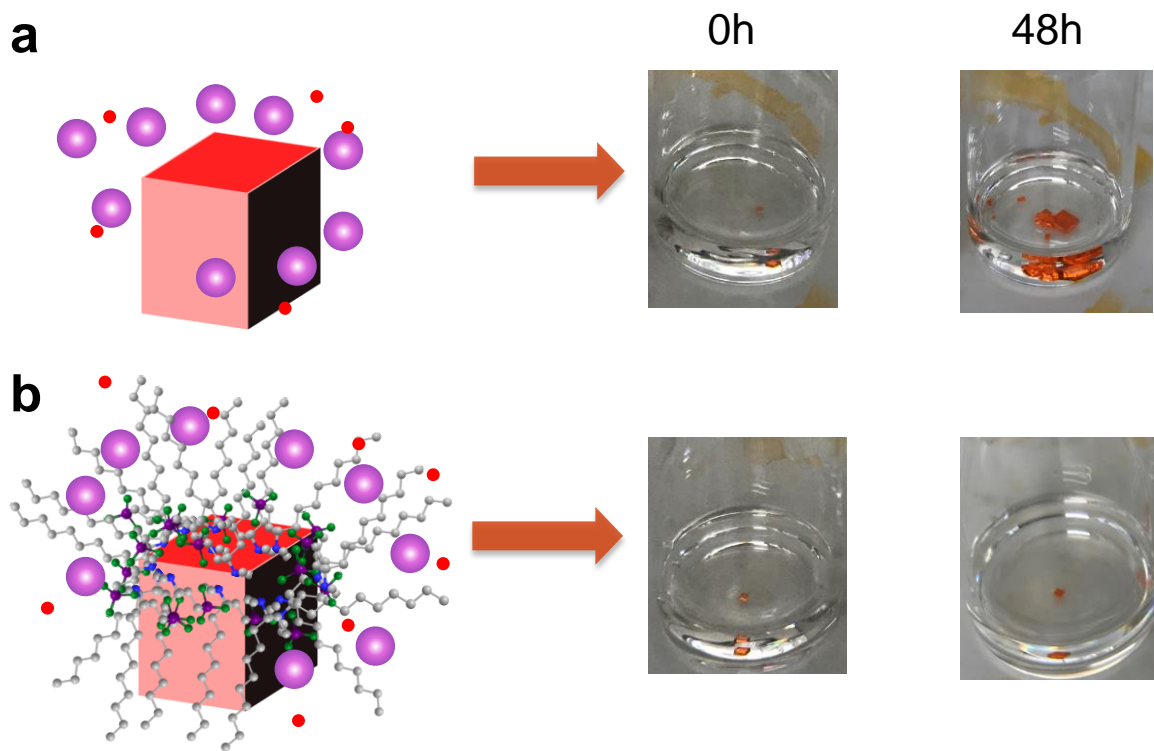

**Supplementary Fig. 3. Crystal growth behavior of MAPbBr<sub>3</sub> single crystals with adding DPSI in precursor. a, b) Scheme and photograph of the crystals growth rate comparison w/o and with DPSI.**

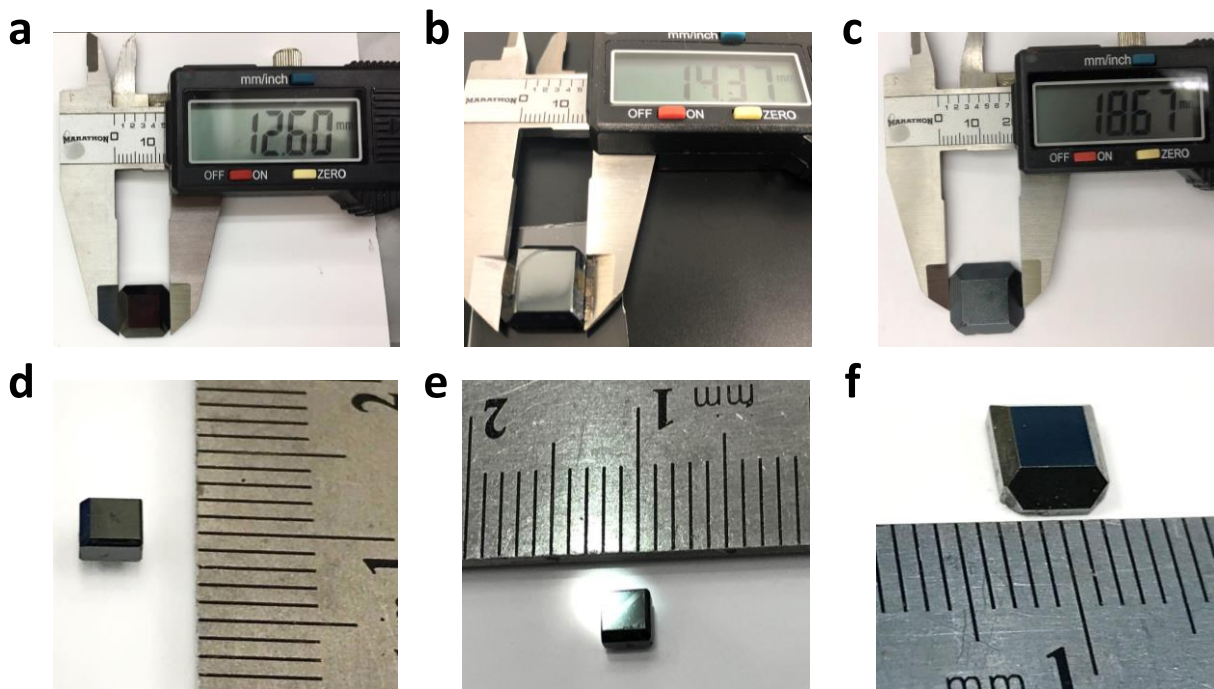

**Supplementary Fig. 4. Photographs of MAPbI<sub>3</sub> single crystals grown with molar ratio of 10% DPSI in different dimensional sizes: a-c) some large crystals above 1 cm in length and d-f) some small crystals.**

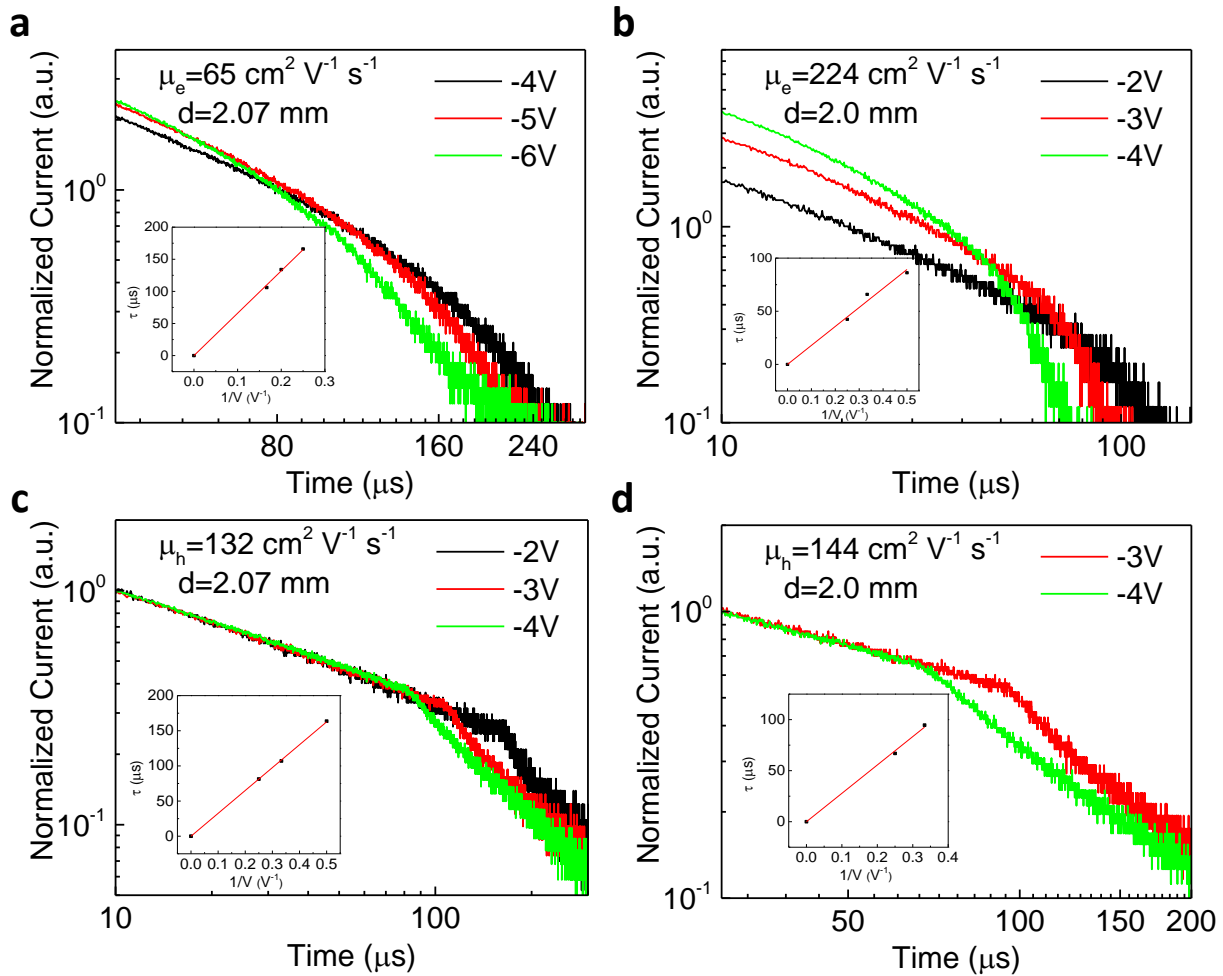

**Supplementary Fig. 5. Crystal quality improvement of MAPbBr<sub>3</sub> single crystals with DPSI in precursor solution.** Electron and hole carrier mobility of the crystals grown **a, b)** w/o and **c, d)** with DPSI, respectively.



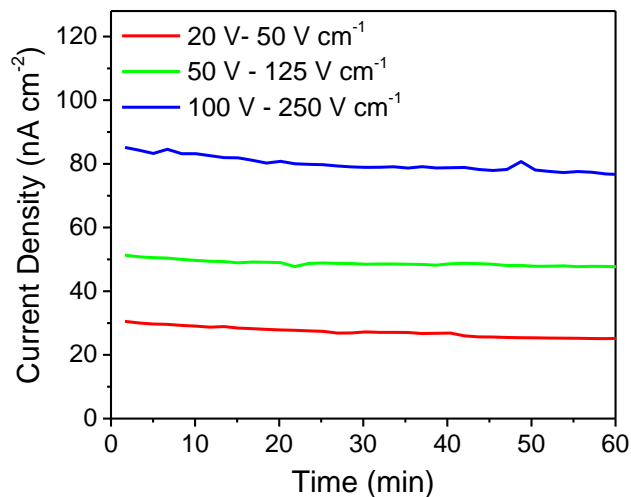

**Supplementary Fig. 6.** Dark current drift of a non-encapsulated device based on MAPbI<sub>3</sub> single crystal grown with DPSI under different applied electric field of 50 V cm<sup>-1</sup>, 125 V cm<sup>-1</sup> and 250 V cm<sup>-1</sup>. The crystal thickness was 4 mm without any surface treatment before device fabrication, and the photograph of the crystal was shown in Supplementary Fig. 4c.

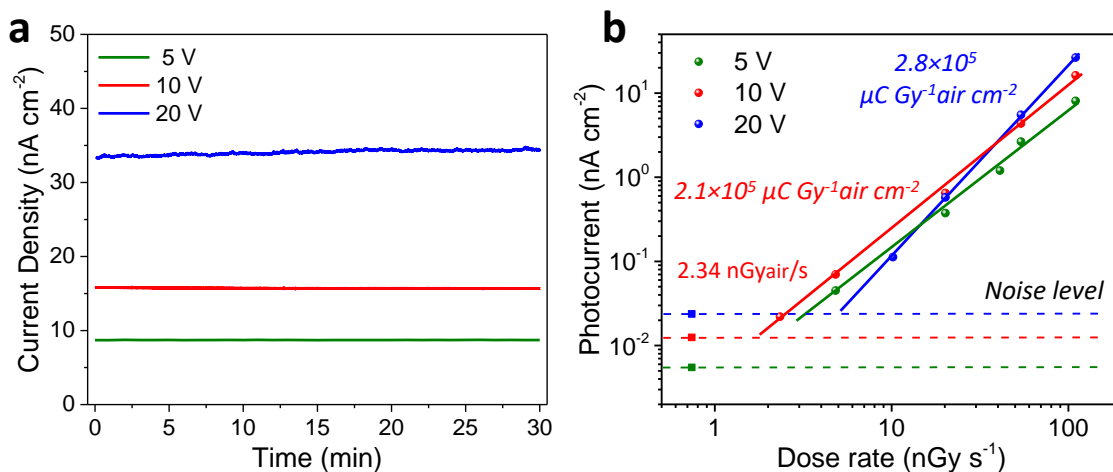

**Supplementary Fig. 7.** Performance of the X-ray detector under soft X-ray energy with energy of 8 keV. **a)** Dark current drift in air without encapsulation, and **b)** X-ray sensitivity measurement excited by 8 keV X-ray beam energy under bias of -5 V, -10 V and -20 V. The

crystal thickness was 3.7 mm, which is the same crystal in Fig. 4b and its photograph is shown in Supplementary Fig. 4a.

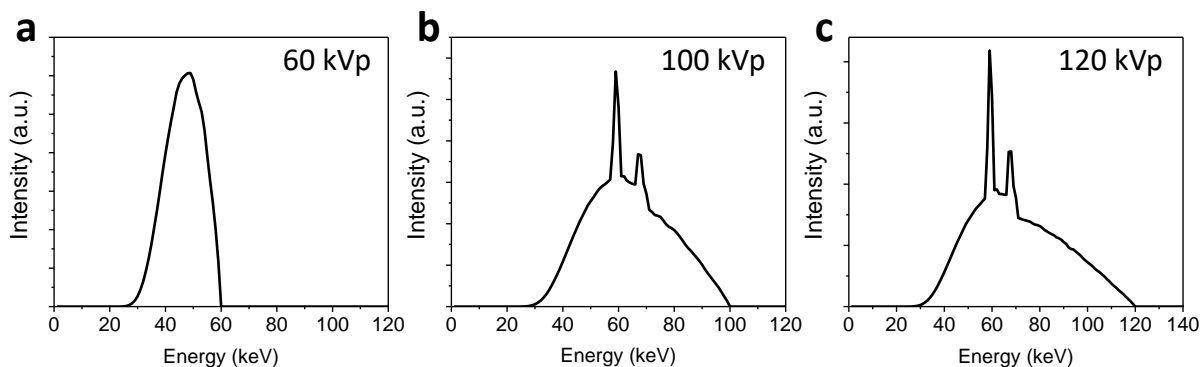

**Supplementary Fig. 8.** Simulated X-ray energy spectrum of the source by SPEKTR 3.0 with 21 mm Al filter at **a)** 60 kVp, **b)** 100 kVp and **c)** 120 kVp.

### Supplementary References

1. Wei, H. *et al.* Sensitive X-ray detectors made of methylammonium lead tribromide perovskite single crystals. *Nature Photonics* **10**, 333-339 (2016).
2. Wei, H. *et al.* Dopant compensation in alloyed  $\text{CH}_3\text{NH}_3\text{PbBr}_{3-x}\text{Cl}_x$  perovskite single crystals for gamma-ray spectroscopy. *Nature materials* **16**, 826-833 (2017).
3. Wei, W. *et al.* Monolithic integration of hybrid perovskite single crystals with heterogenous substrate for highly sensitive X-ray imaging. *Nature Photonics* **11**, 315-321 (2017).
4. Xu, Q. *et al.* High-sensitivity X-ray imaging of a lead halide perovskite single-crystal scintillator. *Optics Letters* **45**, 355-358 (2020).
5. Yang, B. *et al.* Lead-Free Halide  $\text{Rb}_2\text{CuBr}_3$  as Sensitive X-Ray Scintillator. *Advanced Materials* **31**, 1904711 (2019).

6. Xia, M. *et al.* Unveiling the Structural Descriptor of  $A_3B_2X_9$  Perovskite Derivatives toward X-Ray Detectors with Low Detection Limit and High Stability. *Advanced Functional Materials* **30**, 1910648 (2020).
7. Yao, F. *et al.* Room-temperature liquid diffused separation induced crystallization for high-quality perovskite single crystals. *Nature communications* **11**, 1-9 (2020).
8. Zhuang, R. *et al.* Highly sensitive X-ray detector made of layered perovskite-like  $(NH_4)_3Bi_2I_9$  single crystal with anisotropic response. *Nature Photonics* **13**, 602-608 (2019).
9. Yang, B. *et al.* Heteroepitaxial passivation of  $Cs_2AgBiBr_6$  wafers with suppressed ionic migration for X-ray imaging. *Nature communications* **10**, 1-10 (2019).
10. Pan, W. *et al.*  $Cs_2AgBiBr_6$  single-crystal X-ray detectors with a low detection limit. *Nature photonics* **11**, 726-732 (2017).
11. Ye, F. *et al.* High-quality cuboid  $CH_3NH_3PbI_3$  single crystals for high performance X-ray and photon detectors. *Advanced Functional Materials* **29**, 1806984 (2019).
12. Huang, Y. *et al.* A-site Cation Engineering for Highly Efficient  $MAPbI_3$  Single-Crystal X-ray Detector. *Angewandte Chemie International Edition* **58**, 17834-17842 (2019).
13. Shrestha, S. *et al.* High-performance direct conversion X-ray detectors based on sintered hybrid lead triiodide perovskite wafers. *Nature Photonics* **11**, 436-440 (2017).
14. Hu, M. *et al.* Large and dense organic–inorganic hybrid perovskite  $CH_3NH_3PbI_3$  wafer fabricated by one-step reactive direct wafer production with high X-ray sensitivity. *ACS applied materials & interfaces* **12**, 16592-16600 (2020).
15. Zhang, Y. *et al.* Nucleation-controlled growth of superior lead-free perovskite  $Cs_3Bi_2I_9$  single-crystals for high-performance X-ray detection. *Nature communications* **11**, 1-11 (2020).

16. Li, H. *et al.* Sensitive and Stable 2D Perovskite Single-Crystal X-ray Detectors Enabled by a Supramolecular Anchor. *Advanced Materials* **32**, 2003790 (2020).
17. Kim, Y. C. *et al.* Printable organometallic perovskite enables large-area, low-dose X-ray imaging. *Nature* **550**, 87-91 (2017).
18. Zhao, J. *et al.* Perovskite-filled membranes for flexible and large-area direct-conversion X-ray detector arrays. *Nature Photonics* **14**, 612-617 (2020).
19. Song, Y. *et al.* Atomistic Surface Passivation of CH<sub>3</sub>NH<sub>3</sub>PbI<sub>3</sub> Perovskite Single Crystals for Highly Sensitive Coplanar-Structure X-Ray Detectors. *Research* **2020** (2020) .
